# Supplementary material
Source: ML conference proceedings conference paper supplement (https://openreview.net/forum?id=AUL-j4dkWu)

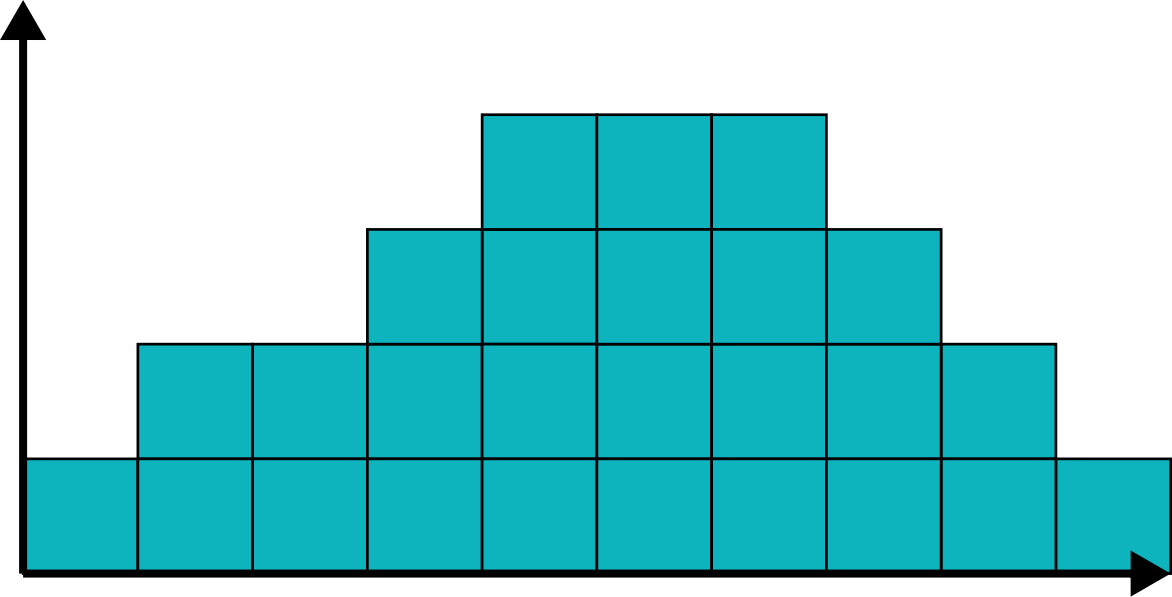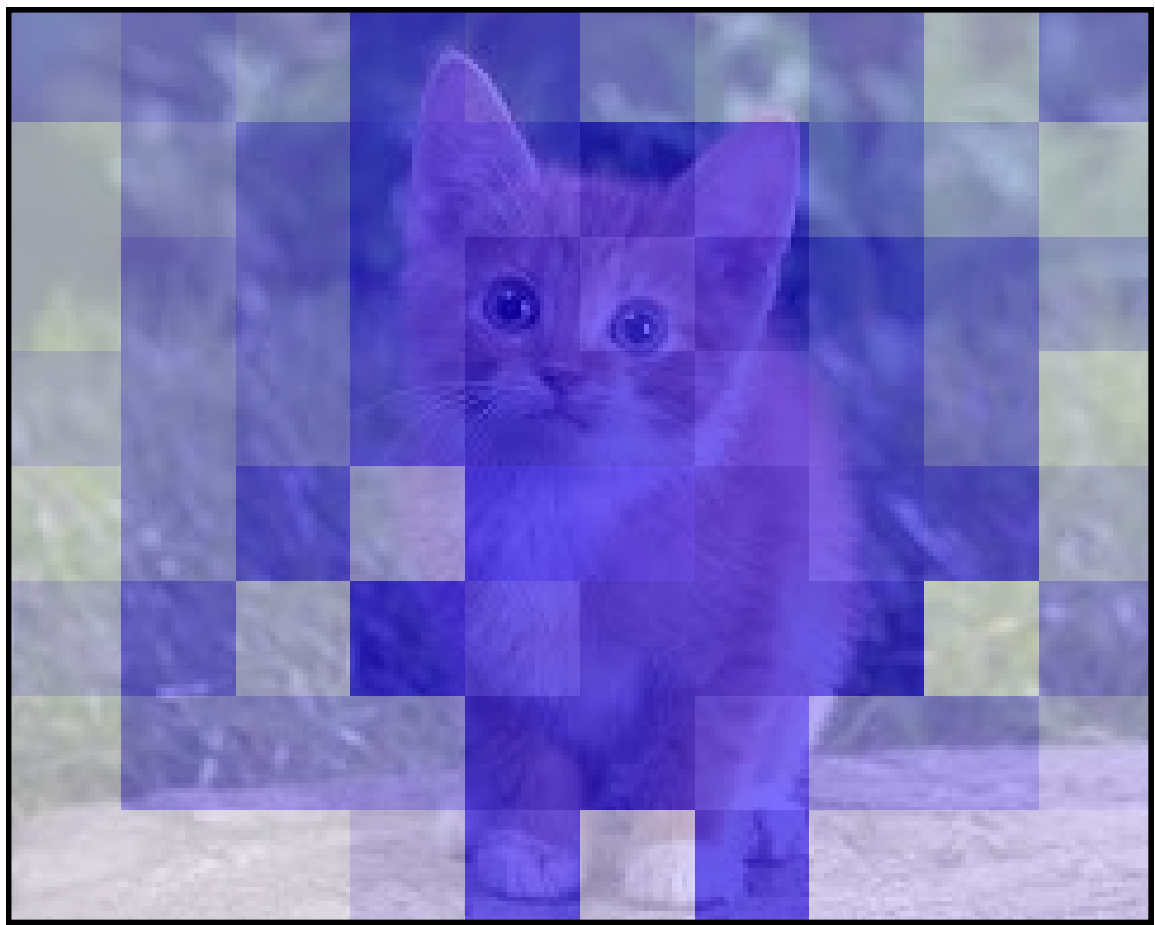

Supplement: supplementary_material [file attachment]

Self-Attention

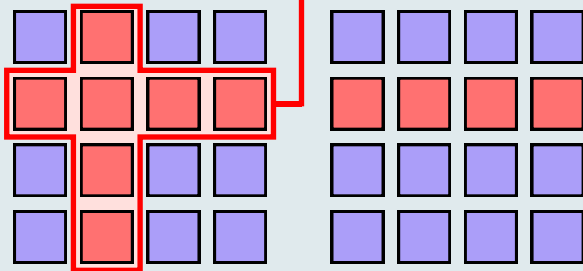

spatial pattern

Supplement: supplementary_material [file attachment]

Self-Attention

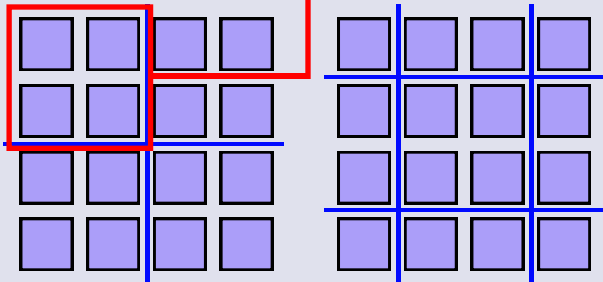

split into windows

Supplement: supplementary_material [file attachment]

ViBid class modules

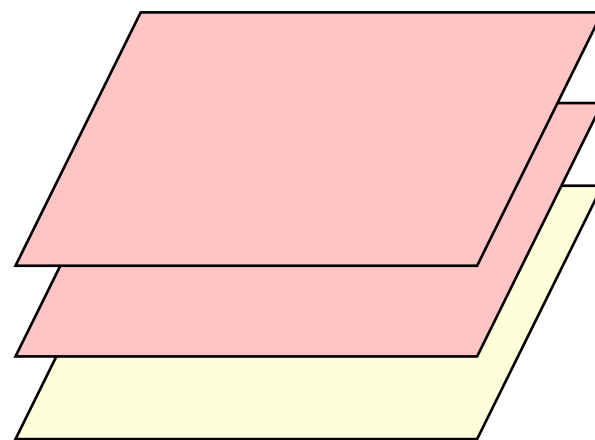

ViBid modules

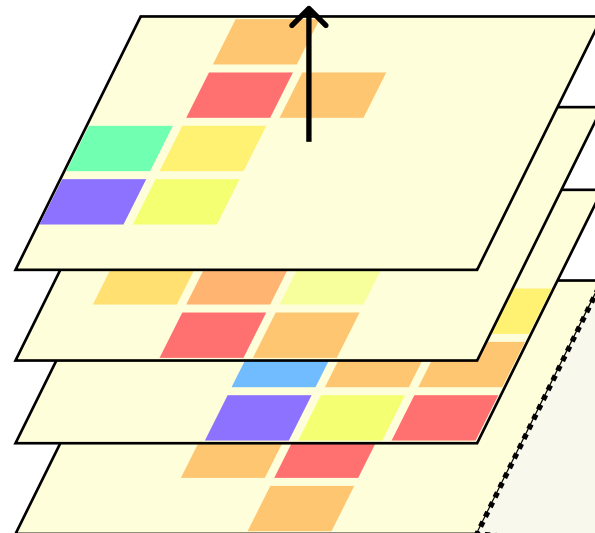

convolutional  
patch embedding

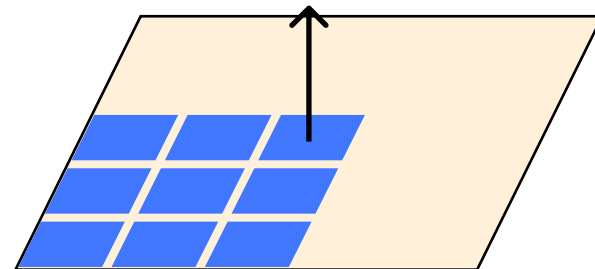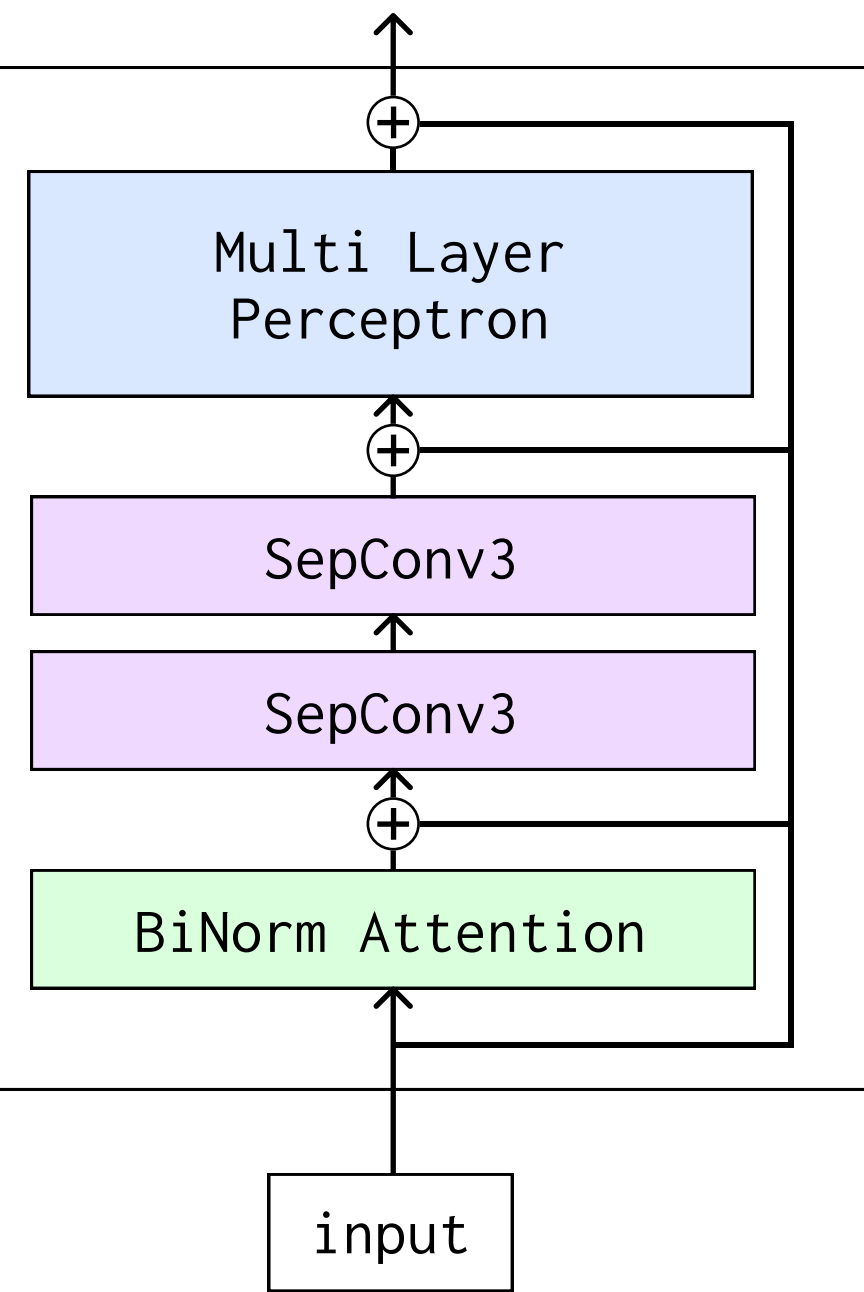

Supplement: supplementary_material [file attachment]

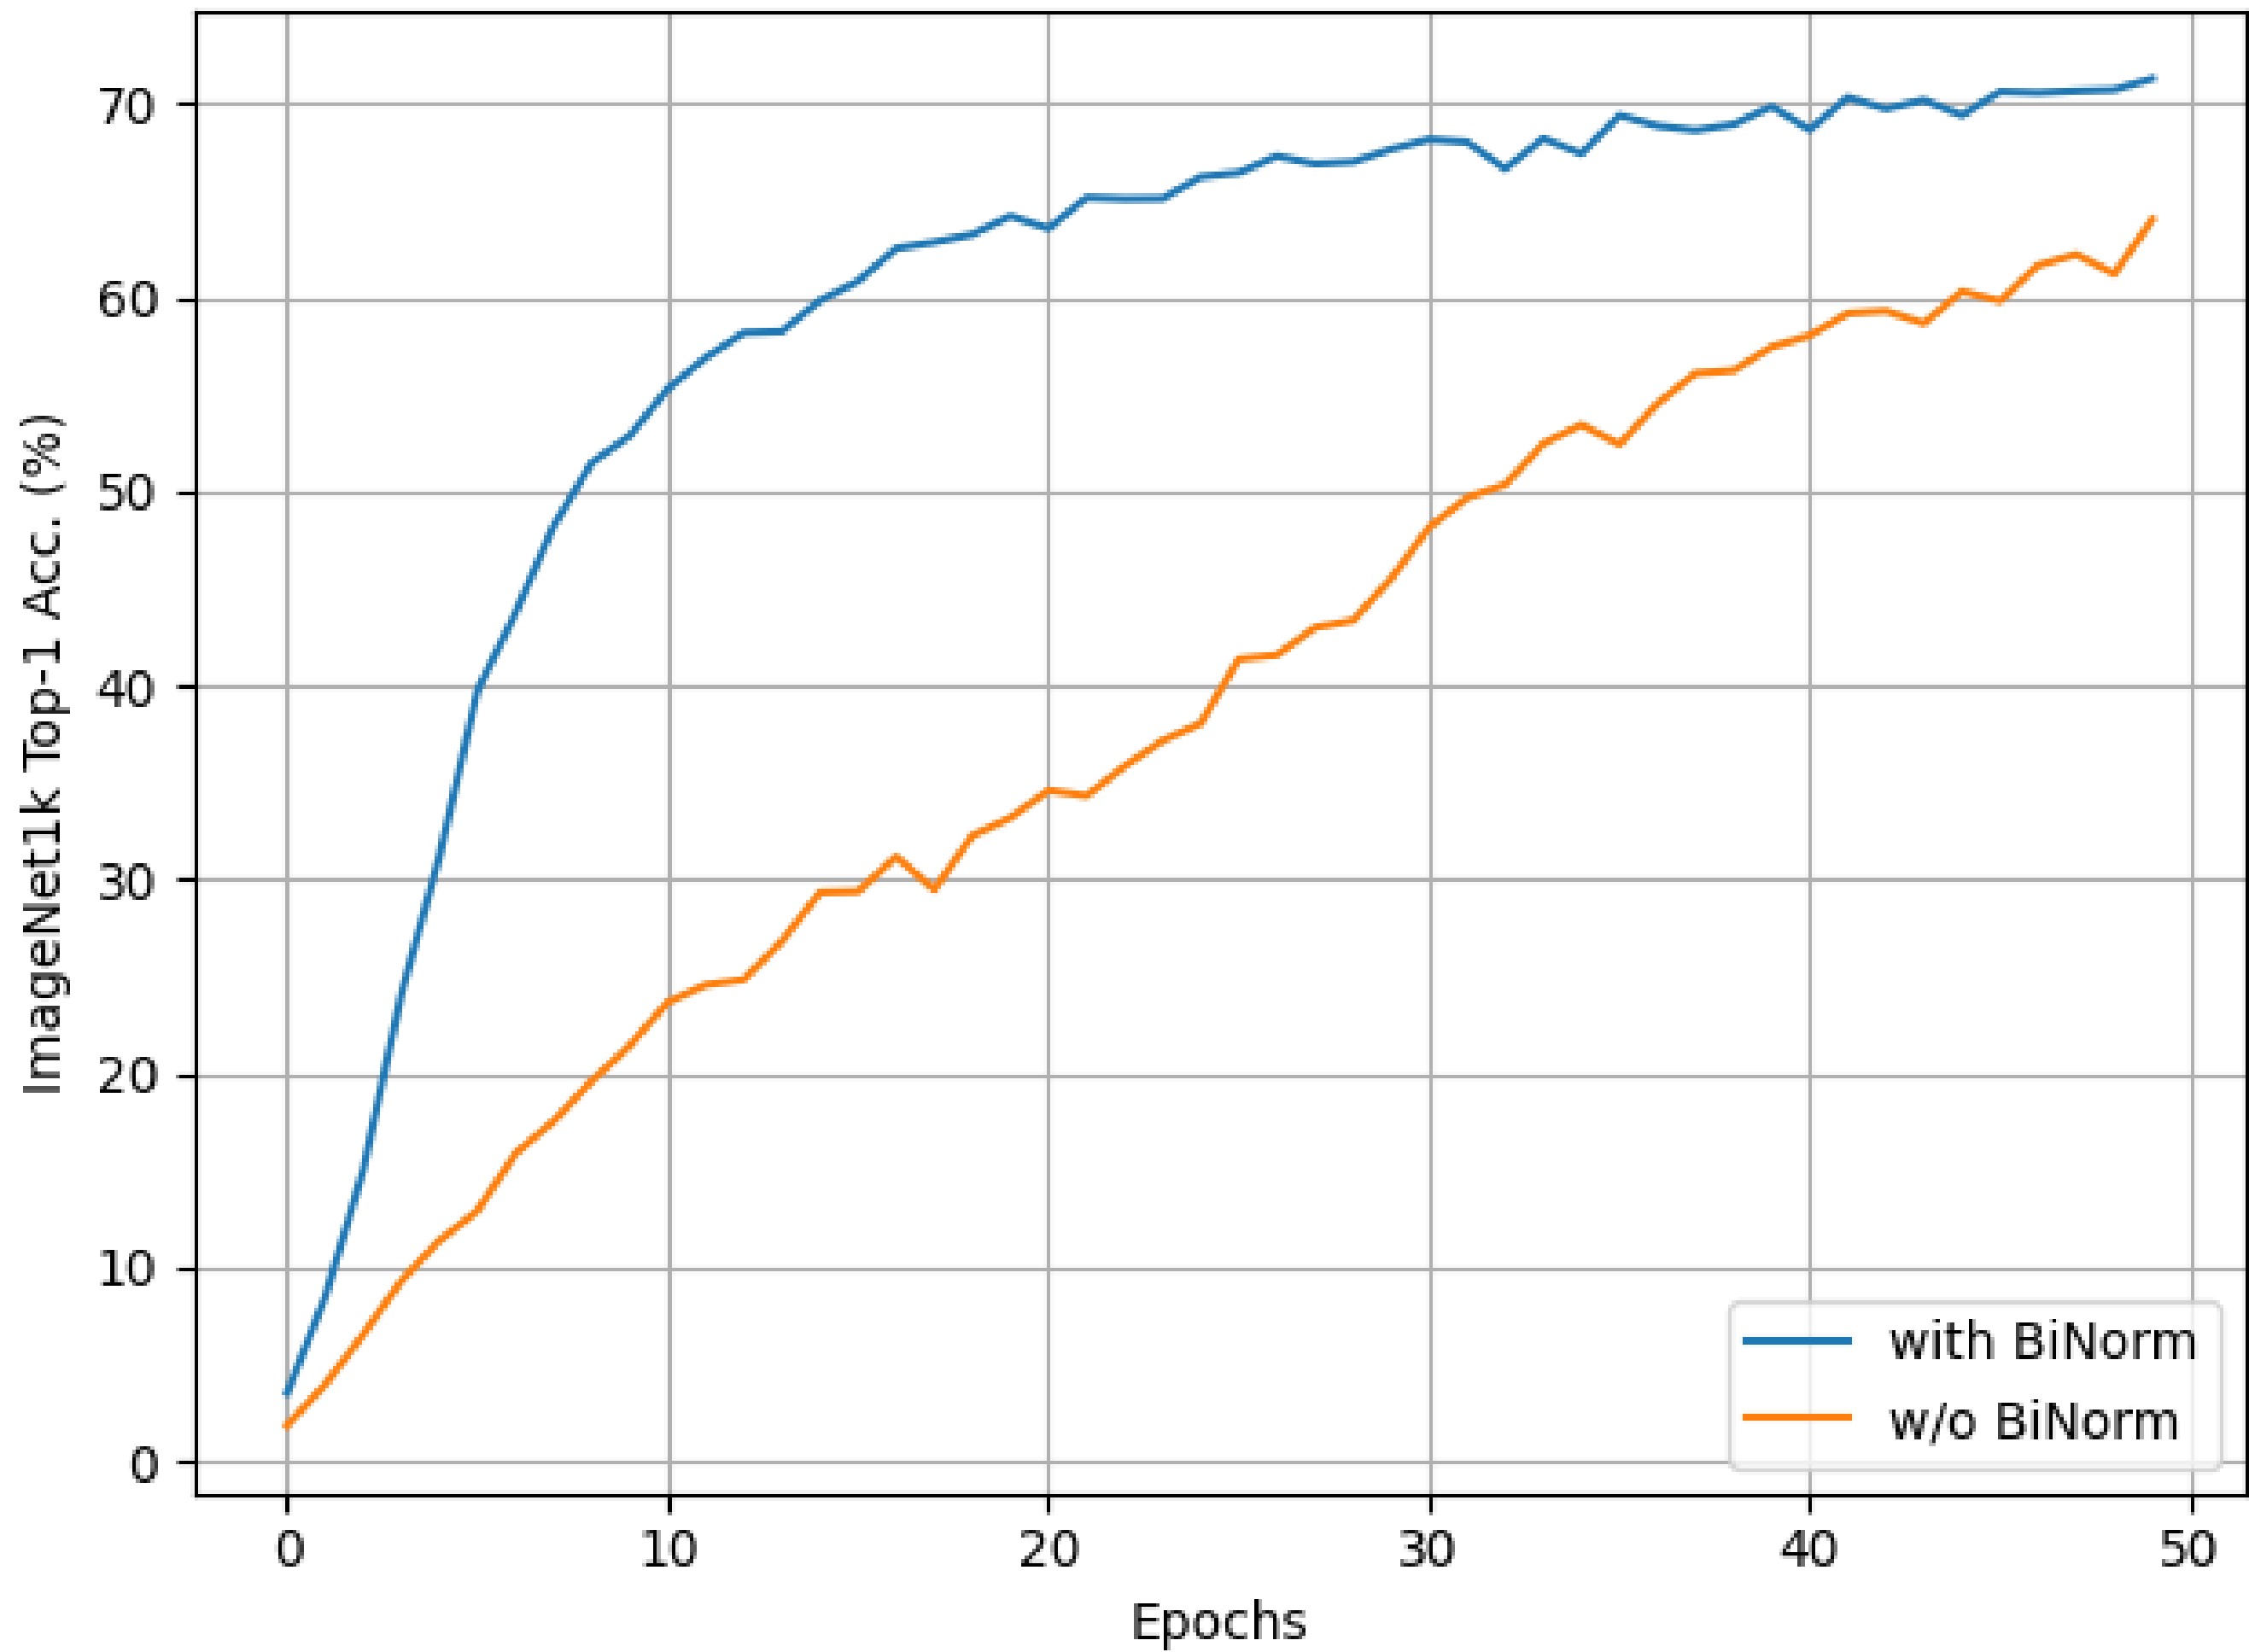

Supplement: supplementary_material [file attachment]

Self-Attention

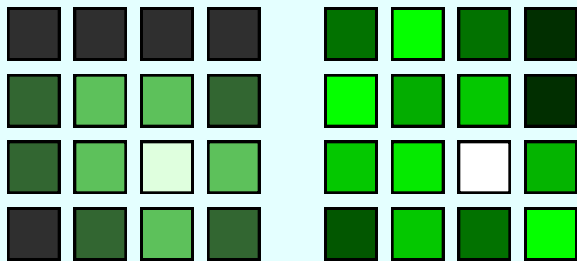

generate kernels

aggregate

Supplement: supplementary_material [file attachment]

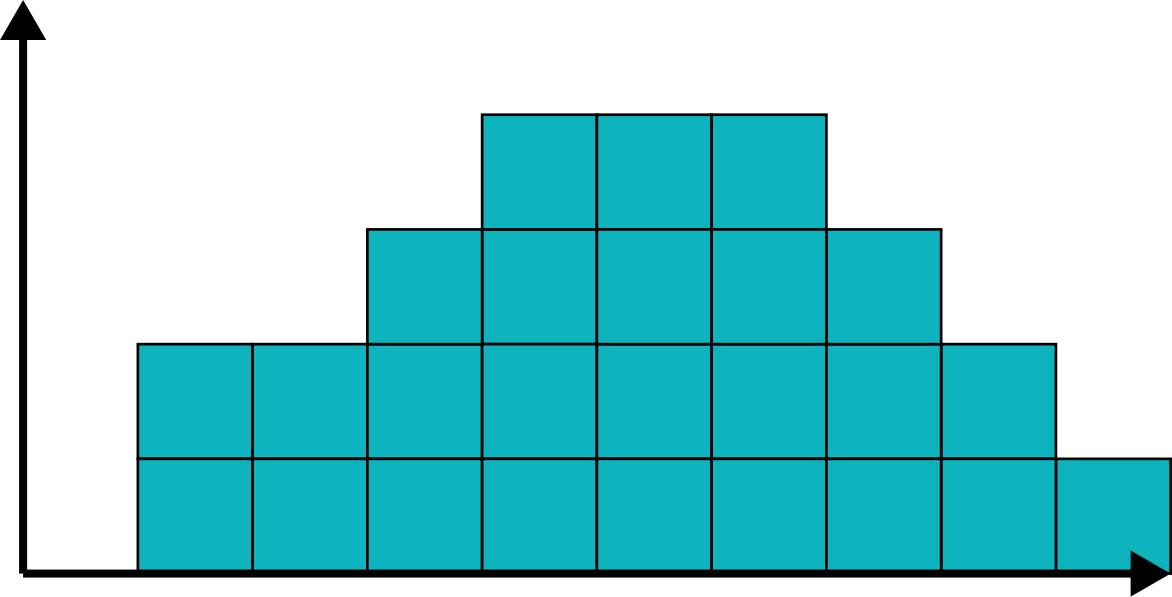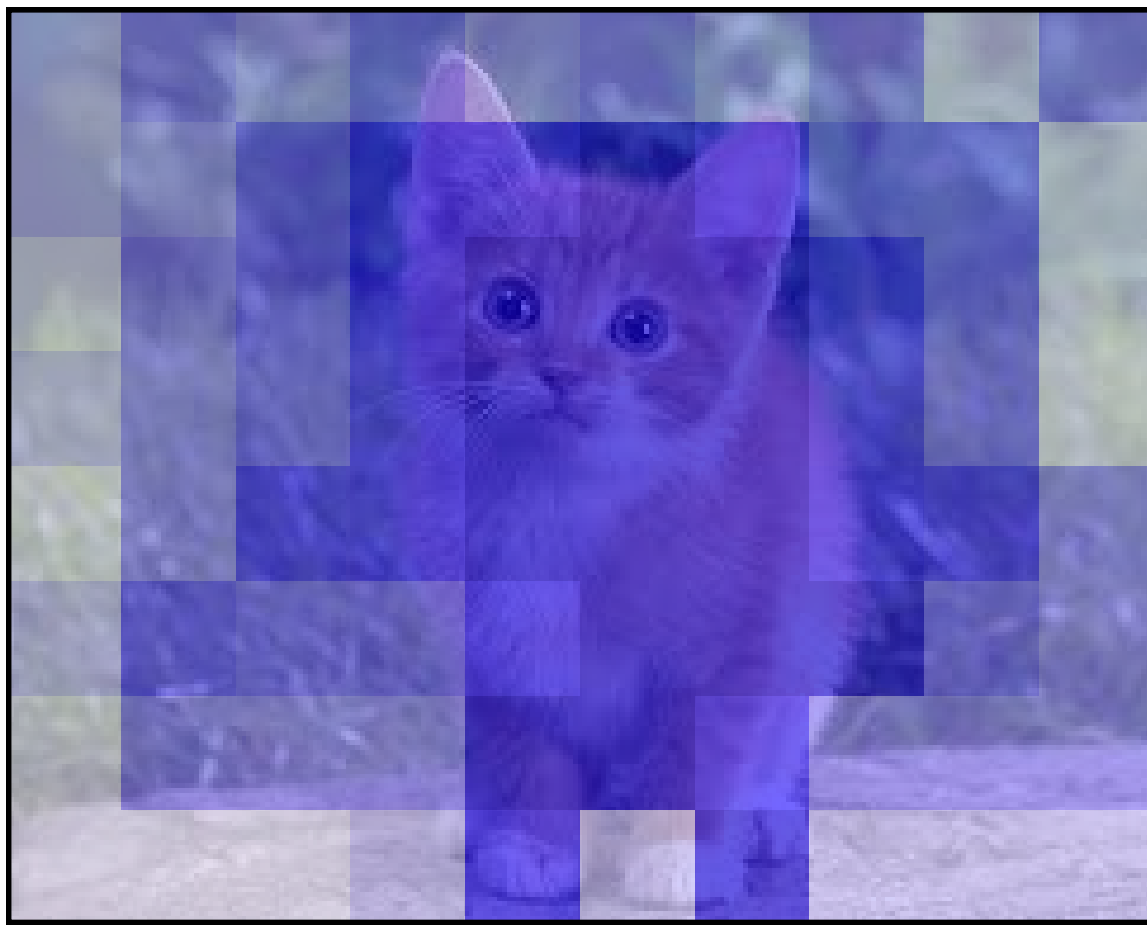

Supplement: supplementary_material [file attachment]

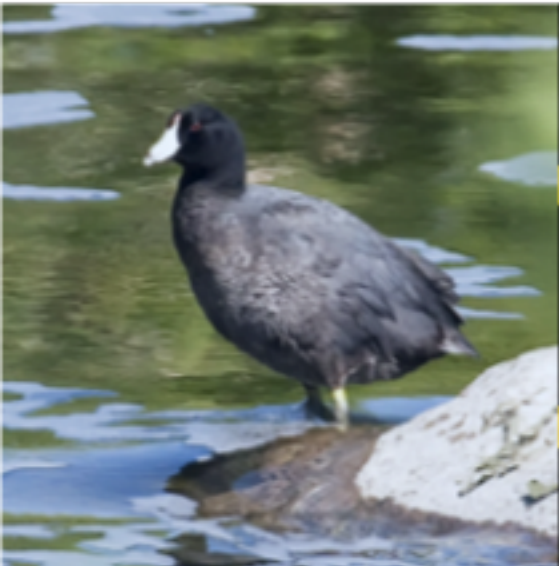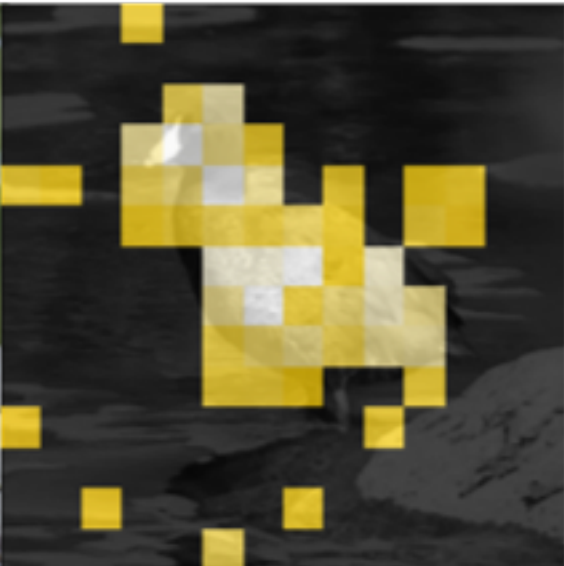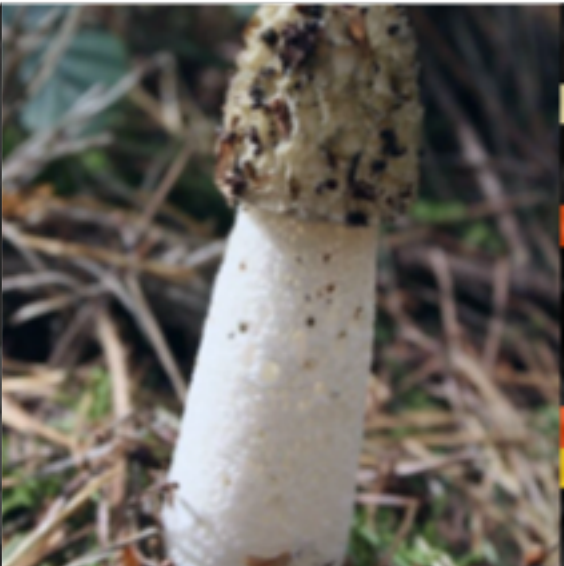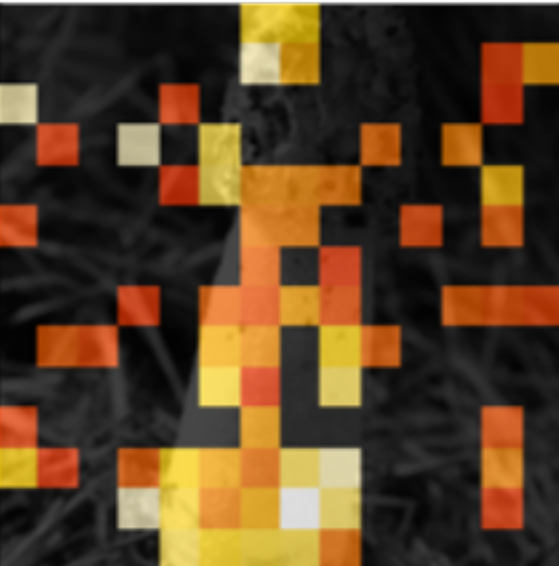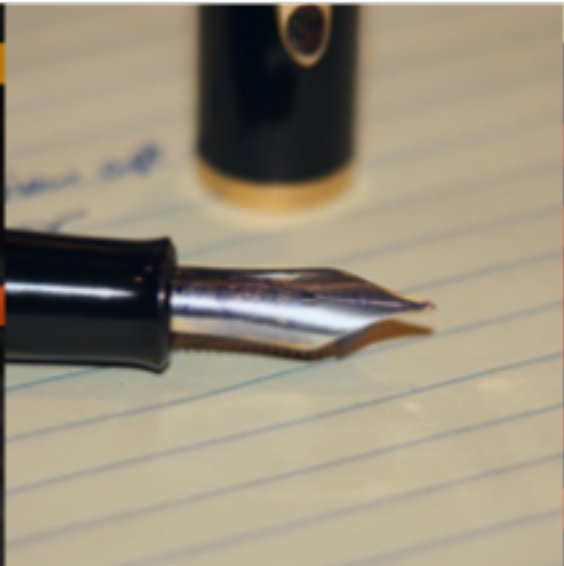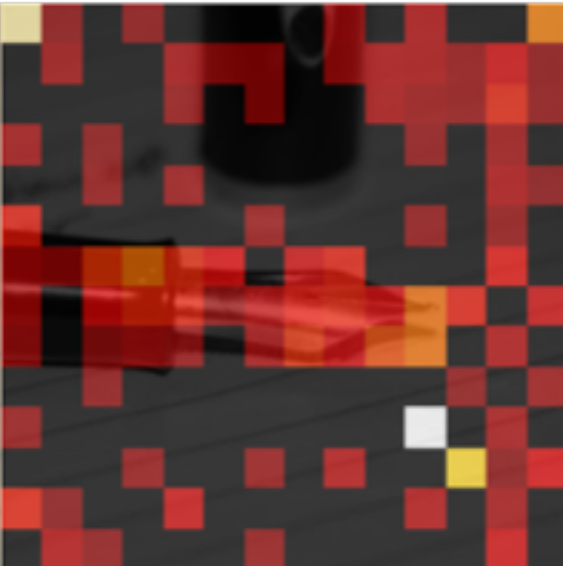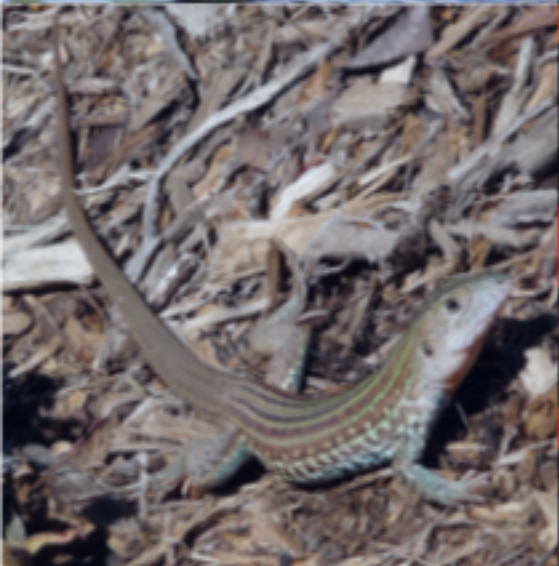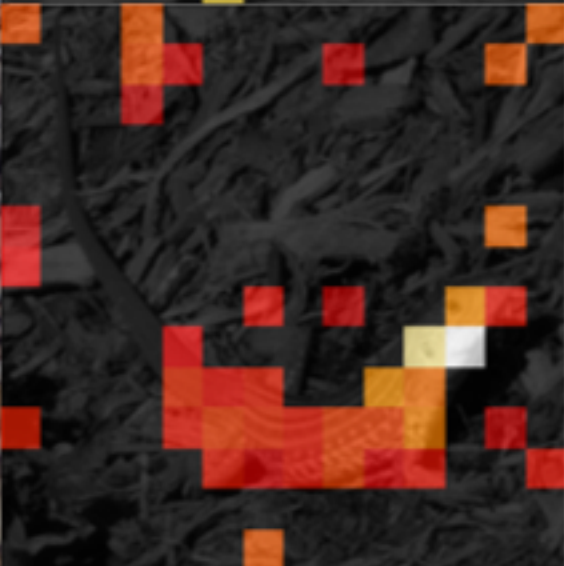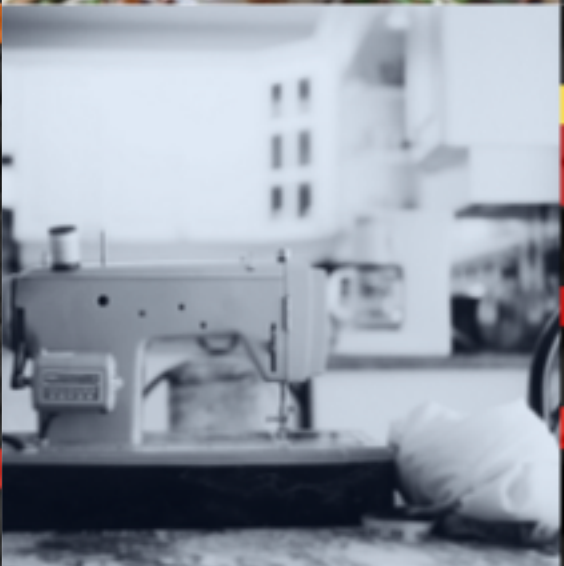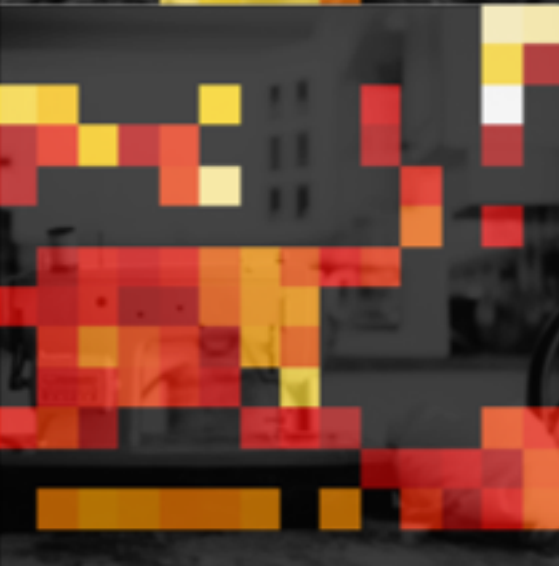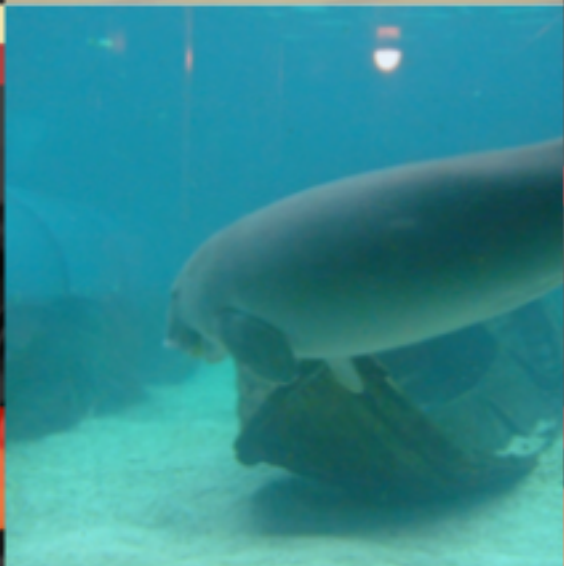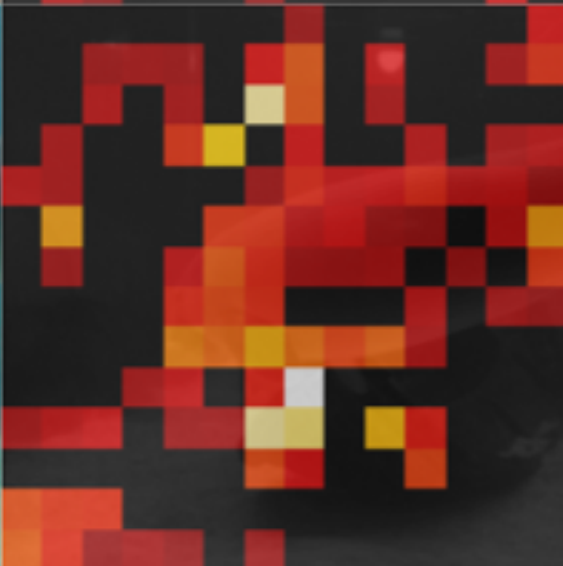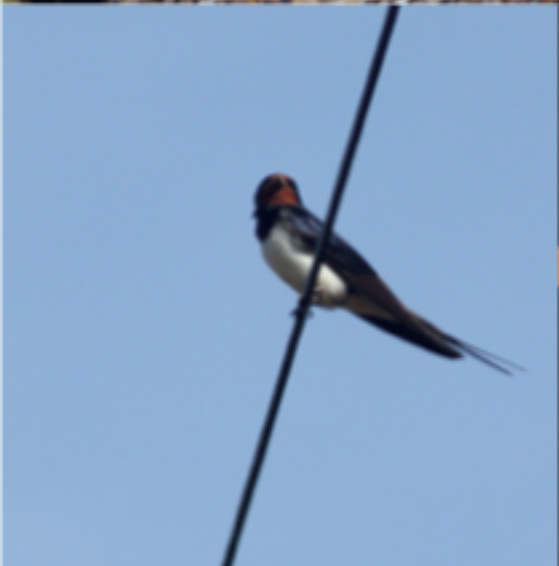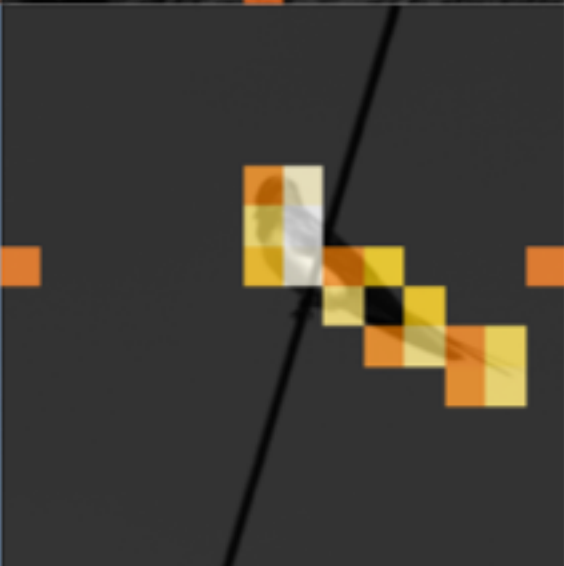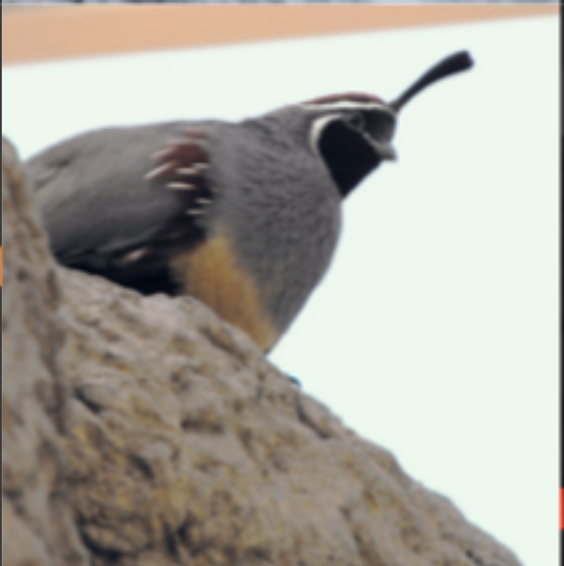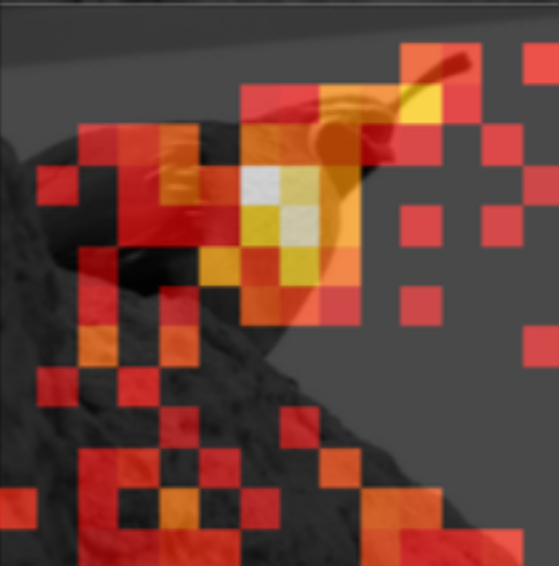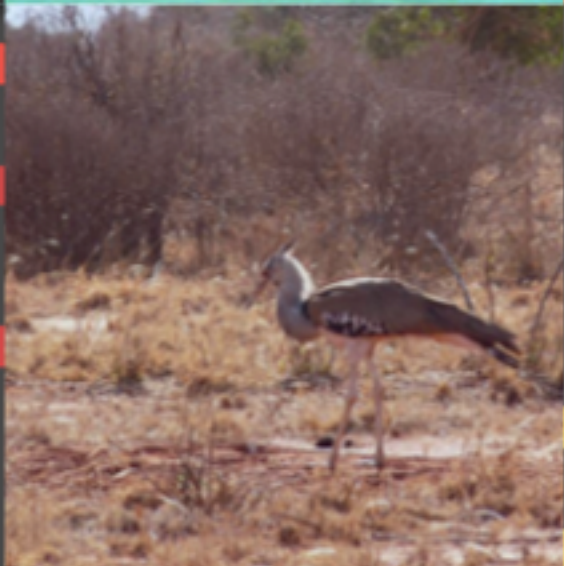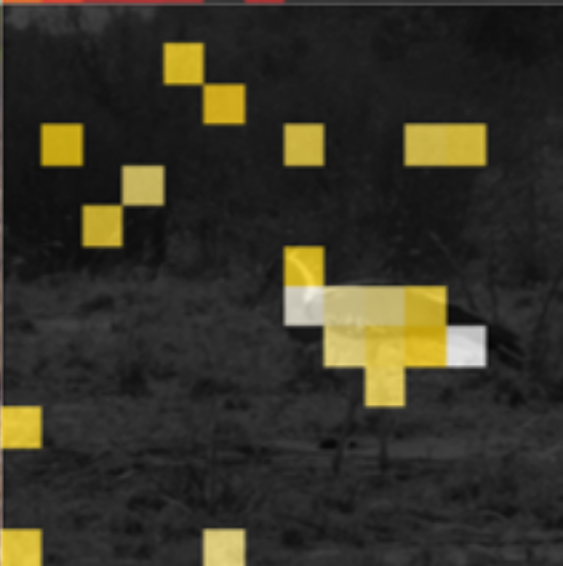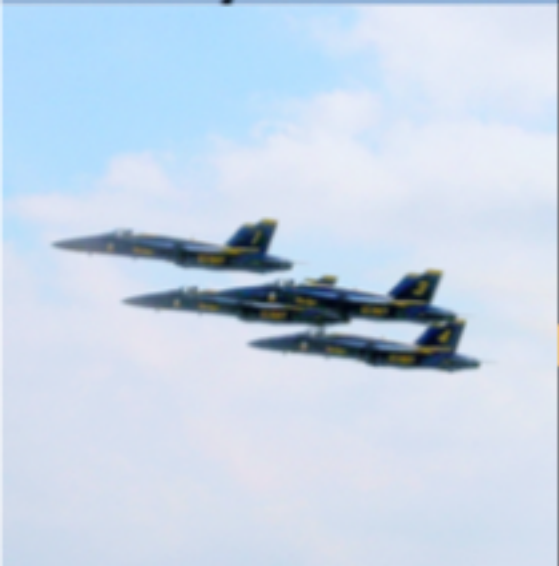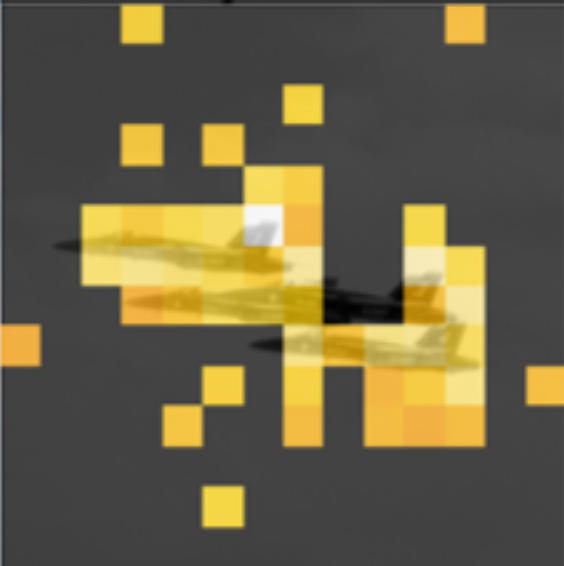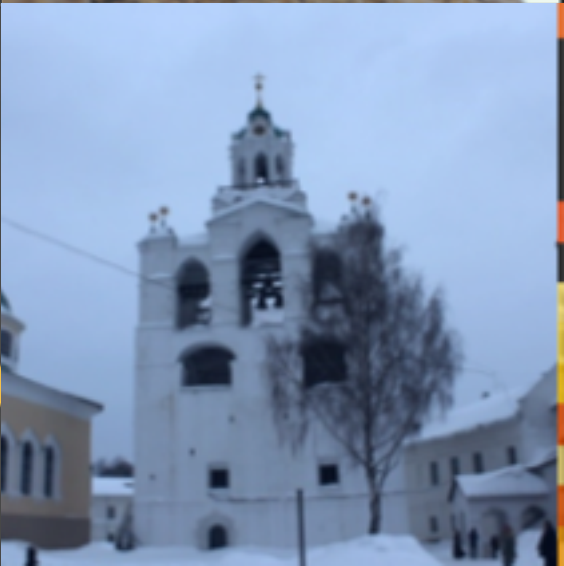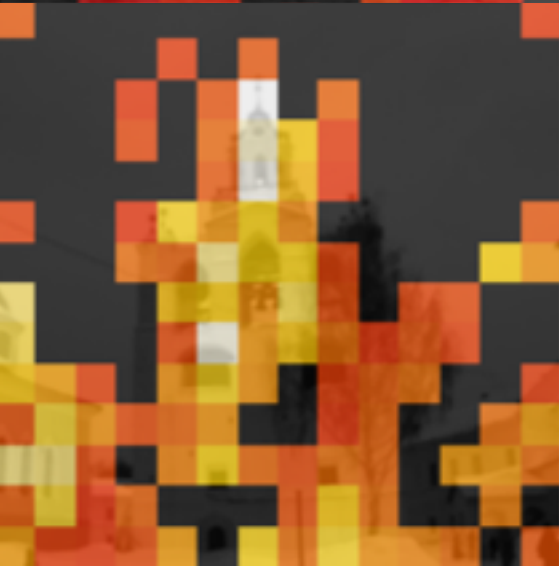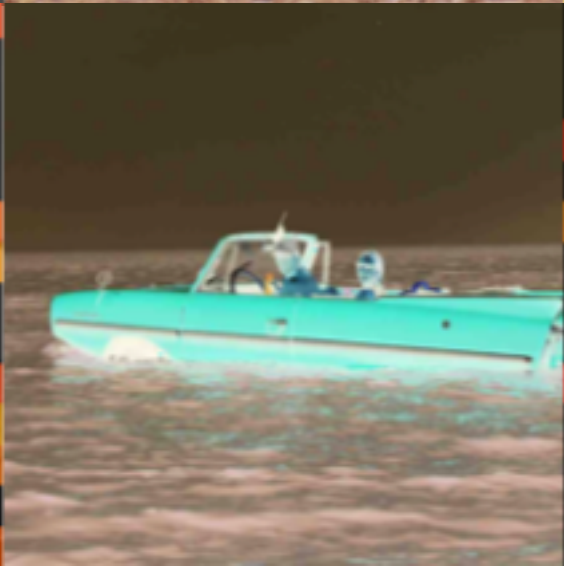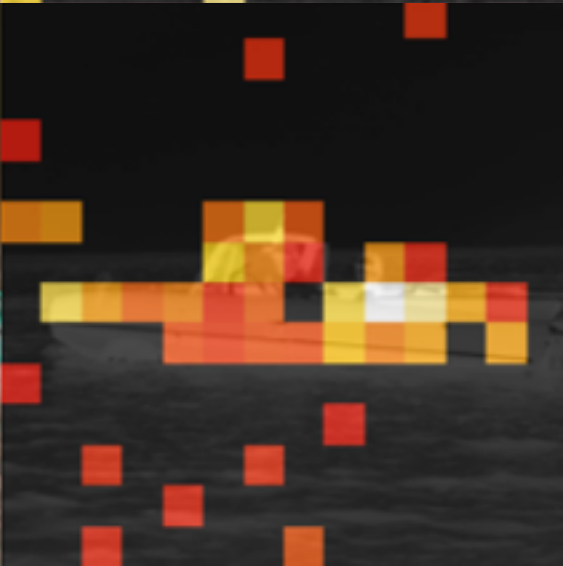

Supplement: supplementary_material [file attachment]

ViBid class modules

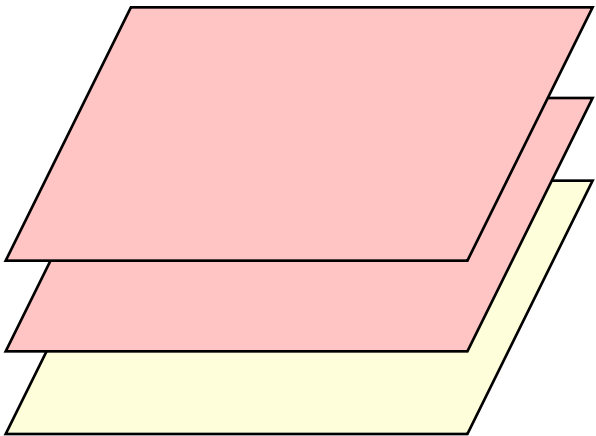

ViBid modules

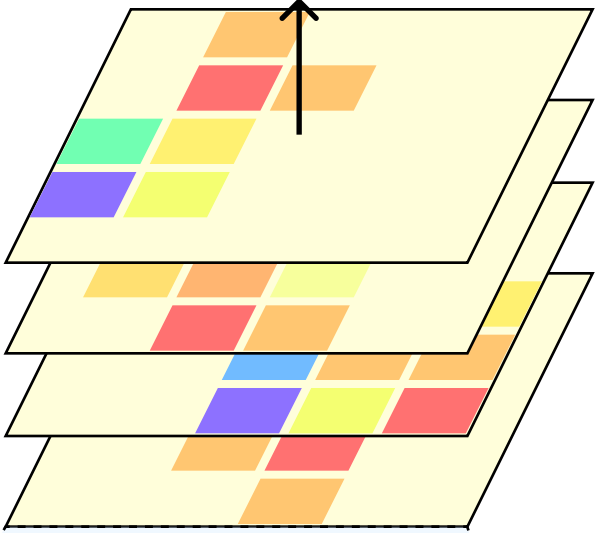

convolutional  
patch embedding

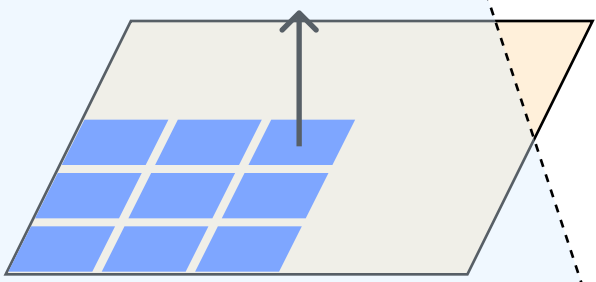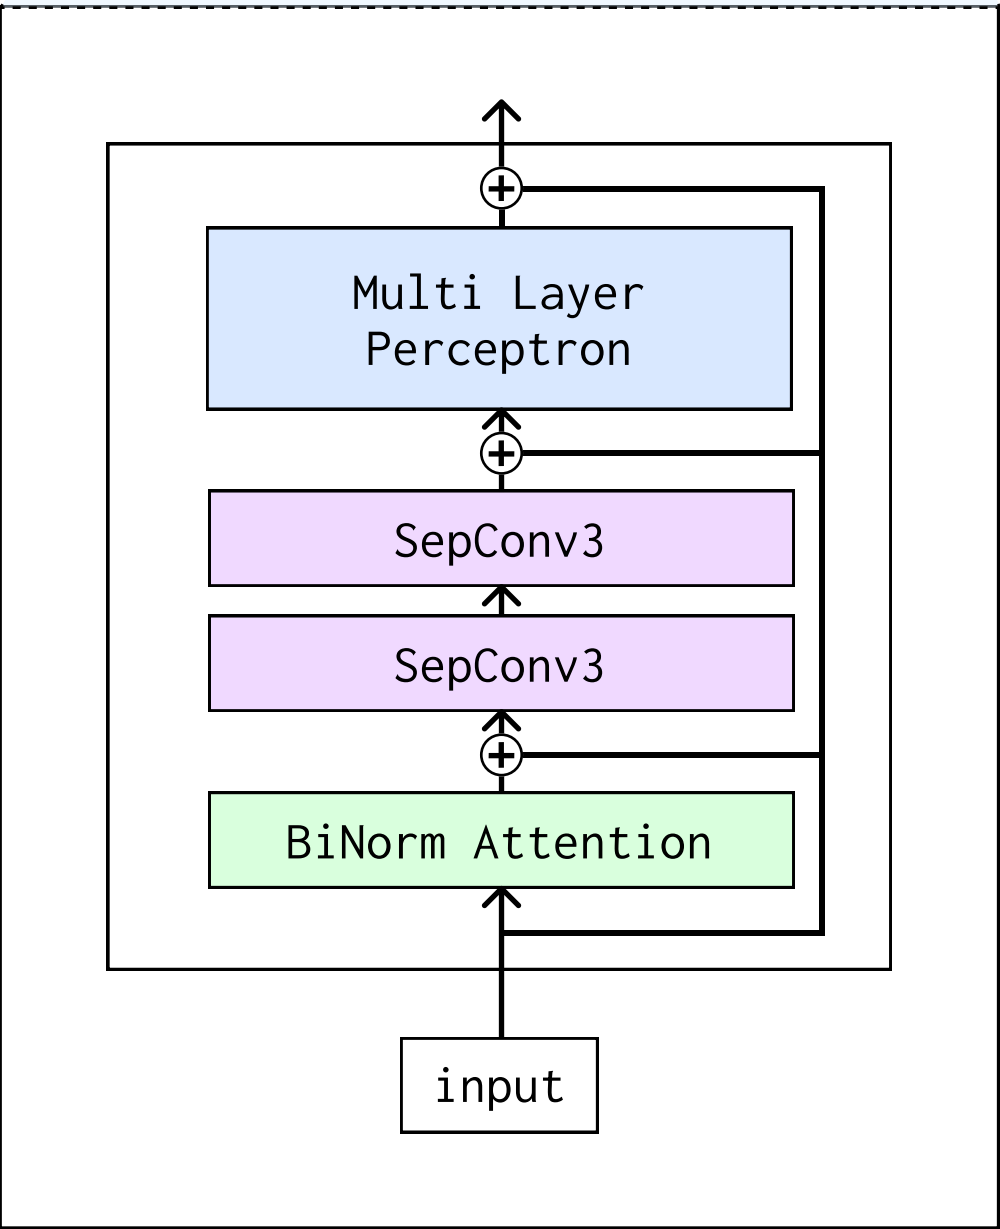

Supplement: supplementary_material [file attachment]

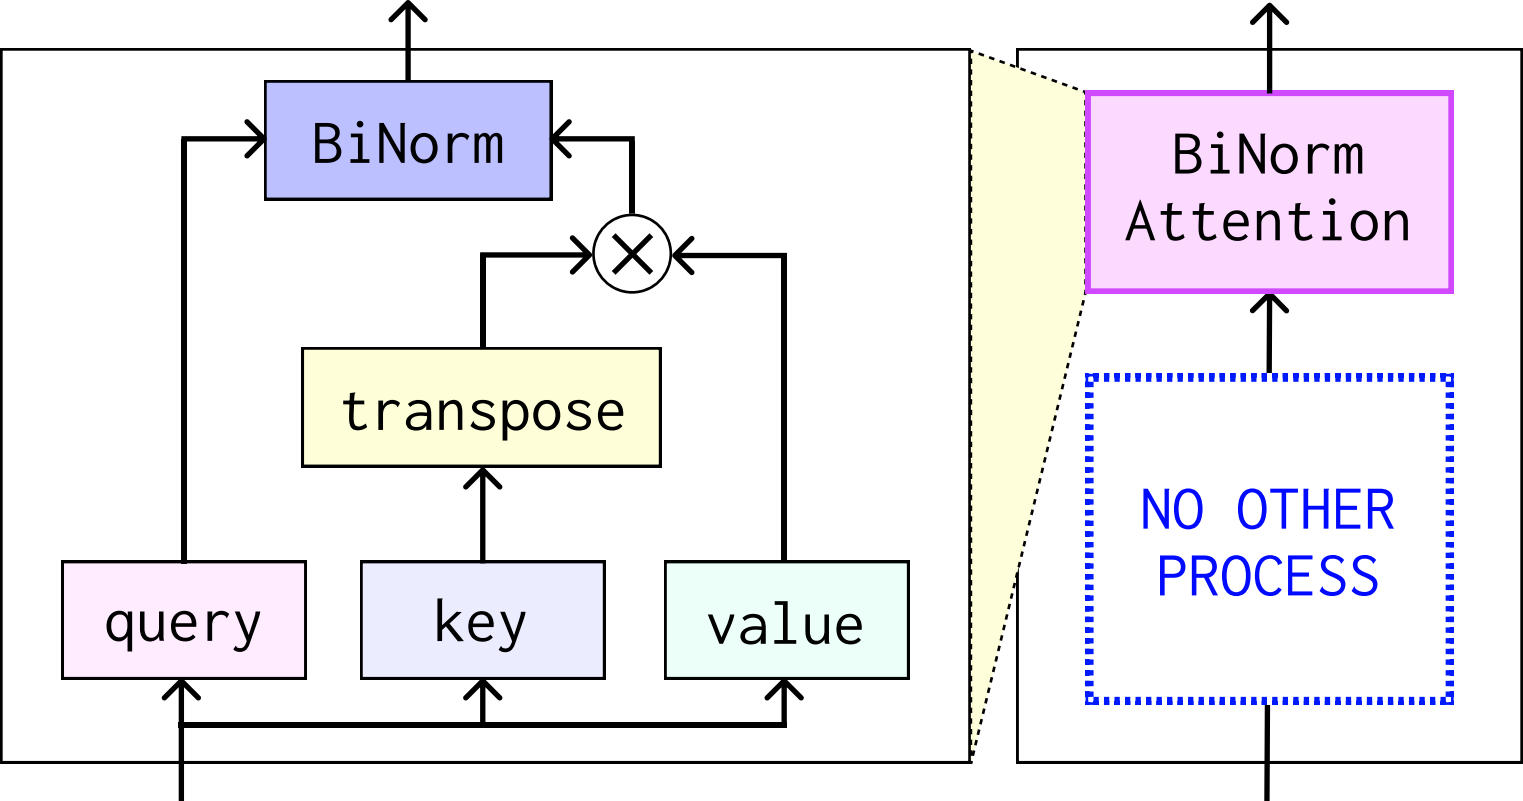

Supplement: supplementary_material [file attachment]

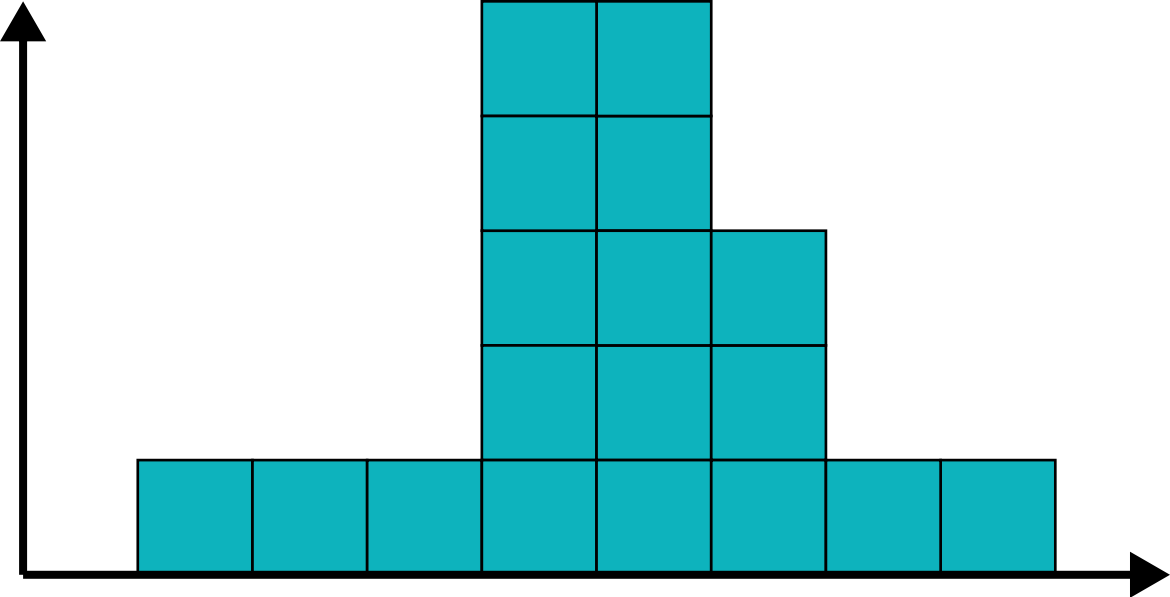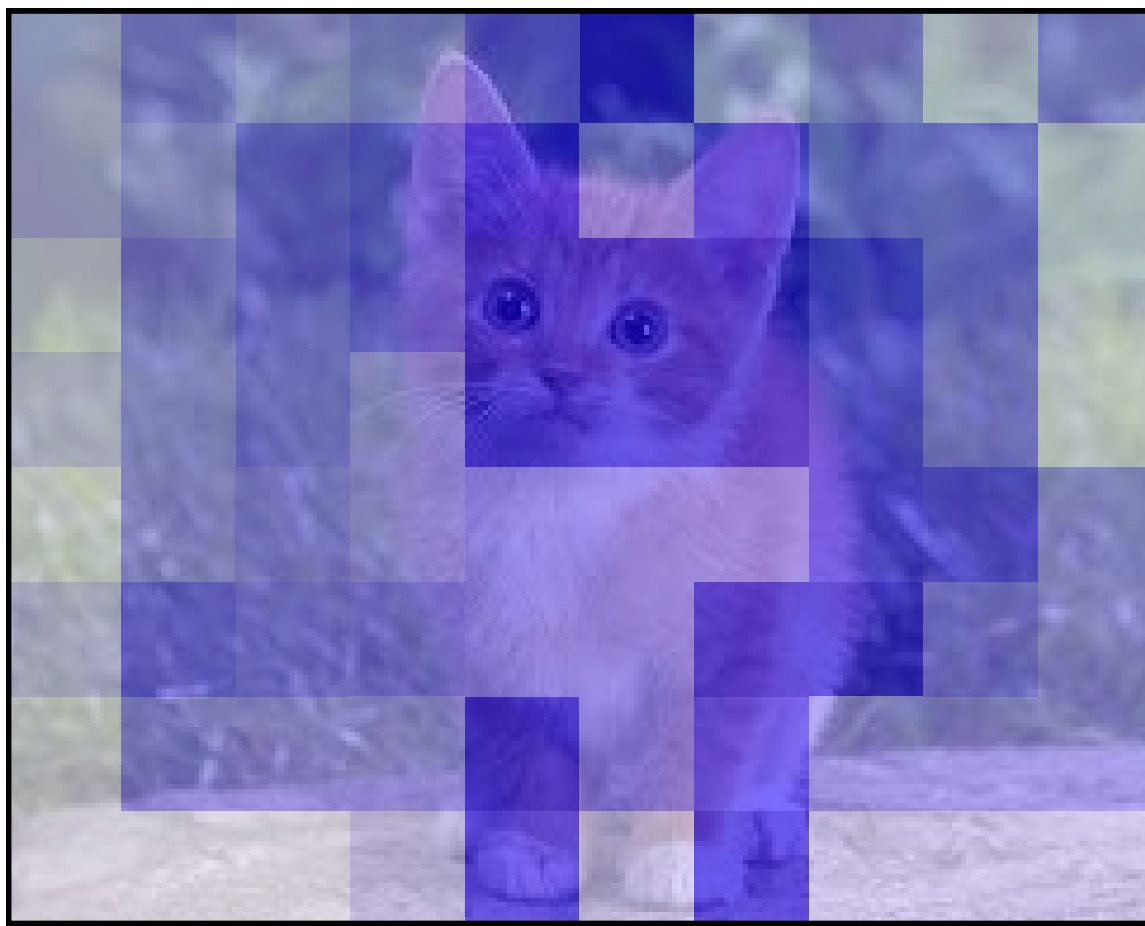

Supplement: supplementary_material [file attachment]

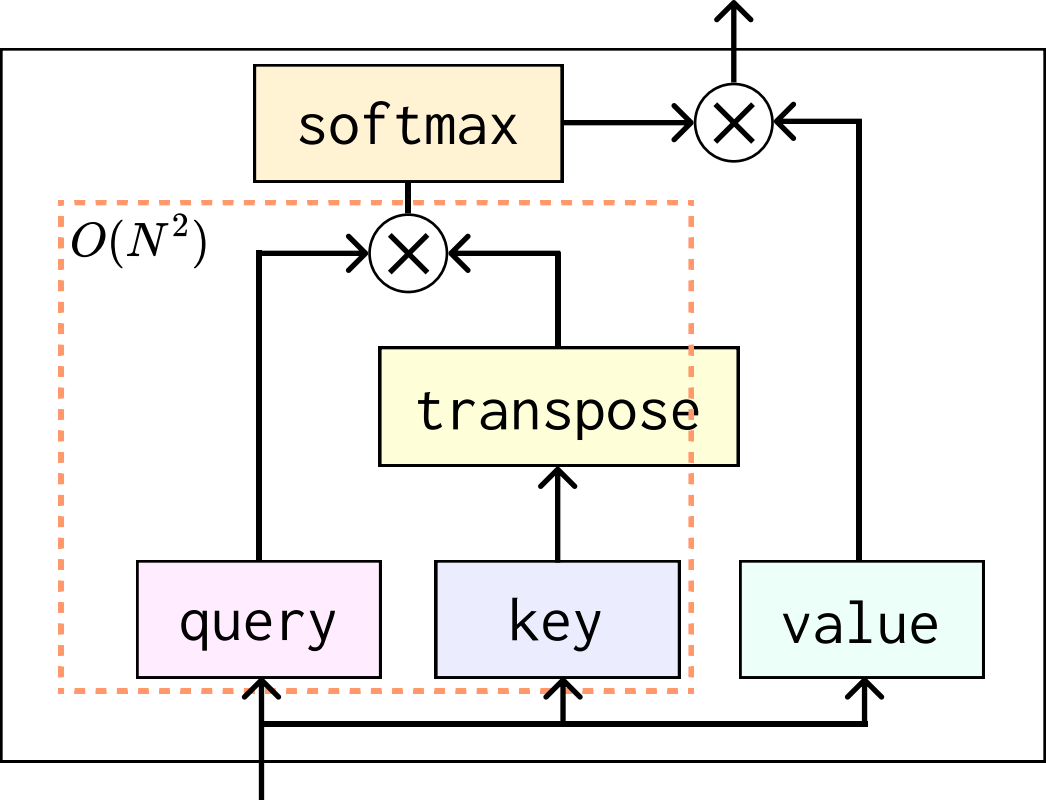

Supplement: supplementary_material [file attachment]
